# Supplementary material for: Artificial intelligence-enhanced CSI-based Wi-Fi sensing for non-contact vital sign monitoring: a systematic review
Source: PeerJ journal article supplement (doi:10.7717/peerj-cs.3375), 2026-01-30
Supplement: Table_A1.docx [file Table_A1.docx]

| **No.** | **Searching String** |
| --- | --- |
| 1 | Vital signs monitoring using Wi-Fi signals |
| 2 | Estimating body temperature, Heart, and breathing rate using CSI |
| 3 | CSI applications for cardiac diseases |
| 4 | CSI-based healthcare monitoring |
| 5 | Wi-Fi-based health and remote monitoring |
| 6 | Non-invasive monitoring using COTS and router devices |
| 7 | ECG-equivalent monitoring techniques using Wi-Fi |
| 8 | Smart and secure health monitoring |
| 9 | Signal Processing in Healthcare |
| 10 | Detecting and monitoring health abnormalities using commodity routers |
| 11 | AI-driven healthcare applications |
| 12 | Wireless sensing for contactless vital signs monitoring |
| 13 | Multi-Person and contactless monitoring using off-shelf routers |
