# Supplementary material for: Artificial intelligence-enhanced CSI-based Wi-Fi sensing for non-contact vital sign monitoring: a systematic review
Source: PeerJ journal article supplement (doi:10.7717/peerj-cs.3375), 2026-01-30
Supplement: Table_A2.docx [file Table_A2.docx]

| No. | Database/ Digital Library |
| --- | --- |
| 1 | IEEEXplore (https://ieeexplore.ieee.org/) |
| 2 | ScienceDirect (https://www.sciencedirect.com/) |
| 3 | SpringerLink (https://link.springer.com/) |
| 4 | Google Scholar (www.scholar.google.co.in) |
| 5 | ACM Digital Library (www.acm.org/dl) |
| 6 | Research Gate (https://www.researchgate.net/search) |
