# Supplementary material for: Artificial intelligence-enhanced CSI-based Wi-Fi sensing for non-contact vital sign monitoring: a systematic review
Source: PeerJ journal article supplement (doi:10.7717/peerj-cs.3375), 2026-01-30
Supplement: Table_A3.docx [file Table_A3.docx]

| **Inclusion Criteria** | **Exclusion Criteria** |
| --- | --- |
| - Peer-reviewed journal articles and conference papers - Studies focusing on Wi-Fi-based vital signs monitoring - Research papers using CSI for sensing - Papers published in the last five years - Studies presenting a novel sensing model/system - Papers in English language | - Pilot papers, books, Editorials, proceedings, magazines. - Research papers using FMCW radar & RSS for sensing - Research papers using any wearables along with Wi-Fi for sensing - Papers published prior to 2019 - Literature survey papers without functioning system. - Non-English papers |
