# Supplementary material for: Artificial intelligence-enhanced CSI-based Wi-Fi sensing for non-contact vital sign monitoring: a systematic review
Source: PeerJ journal article supplement (doi:10.7717/peerj-cs.3375), 2026-01-30
Supplement: Table_A4.docx [file Table_A4.docx]

| **Resource Name** | **Search in** | **Total results** | **Initial Selection** | **Final Selection** |
| --- | --- | --- | --- | --- |
| **IEEE Xplore** | Abstract, Title, Keywords | 5,473 | 152 | 27 |
| **Google Scholar** | 312 | 8 | 2 |
| **Research Gate** | 550 | 27 | 5 |
| **Science Direct** | 1,412 | 24 | 3 |
| **Springer Link** | 250 | 38 | 2 |
| **ACM Digital Library** | 576 | 20 | 6 |
| **Total** | 8,573 | 269 | 45 |
